# Supplementary material for: Spatial clusters of gonorrhoea in England with particular reference to the outcome of partner notification: 2012 and 2013
Source: PLOS journal article supplement (doi:10.1371/journal.pone.0195178), 2018-04-02
Supplement: S1 (10.1371/journal.pone.0195178.s001) [file journal.pone.0195178.s001]

**General Options:**

Time precision: Day

Study period: 2012 & 2013

Coordinates: Cartesian

Type of analysis: Retrospective space-time

Time aggregation: 7 days

Probability model: Discrete Poisson

Scan for areas with: High rates

**Advanced Analysis Options:**

Spatial cluster size: 1% of population at risk

Maximum temporal cluster size: 183 days
